# Supplementary material for: Vaccination with Prion Peptide-Displaying Polyomavirus-Like Particles Prolongs Incubation Time in Scrapie-Infected Mice
Source: MDPI journal article supplement (doi:10.3390/v13050811), 2021-04-30
Supplement: s1 [file s1]

Table S1: Optical density (OD) of indirect VP1 IgG ELISA displaying raw data from mice sera after immunisation with corresponding VLP constructs at three different timepoints: 0 (priming), 1 (21 days, first boost) and 2 (42 days, second boost). Indirect ELISA is performed with yeast-expressed VP1-protein as antigen. Controls include non-immunised (Co) and VP1/2 immunised mice

| OD405   | animal 1 | animal 2 | animal 3 | animal 4 | animal 5 |
|---------|----------|----------|----------|----------|----------|
| Co-0    | 0.32     | 0.26     | 0.31     | 0.24     | 0.30     |
| Co-1    | 0.41     | 0.20     | 0.22     | 0.22     | 0.19     |
| Co-2    | 0.39     | 0.70     | 0.68     | 0.48     | 0.22     |
| VP1/2-0 | 0.32     | 0.40     | 0.51     | 0.32     | *        |
| VP1/2-1 | 0.27     | 0.28     | 0.37     | 0.34     | *        |
| VP1/2-2 | 1.44     | 1.70     | 1.63     | 1.60     | *        |
| K1-0    | 1.22     | 1.60     | 1.06     | 1.22     | 1.19     |
| K1-1    | 2.05     | 2.32     | 0.65     | 1.92     | 2.07     |
| K1-2    | 0.72     | 2.10     | 0.54     | 1.69     | 1.49     |
| K2-0    | 1.68     | 0.56     | 0.72     | 0.60     | 0.84     |
| K2-1    | 1.94     | 0.52     | 0.88     | 2.11     | 1.96     |
| K2-2    | 2.22     | 2.27     | 1.15     | 1.82     | 1.87     |
| K3-0    | 0.33     | 0.70     | 1.10     | 0.91     | 1.55     |
| K3-1    | 2.33     | 1.55     | 1.51     | 1.98     | 2.07     |
| K3-2    | 2.24     | 1.37     | 1.67     | 1.67     | 1.99     |
| K4-0    | 0.78     | 0.47     | 0.46     | 0.50     | 1.50     |
| K4-1    | 1.31     | 1.27     | 2.08     | 1.21     | 2.08     |
| K4-2    | 1.82     | 1.24     | 2.18     | 1.79     | 1.77     |
| K5-0    | 0.88     | 0.46     | 0.46     | 0.76     | *        |
| K5-1    | 2.09     | 1.50     | 1.60     | 1.63     | *        |
| K5-2    | 2.03     | 1.51     | 1.50     | 1.56     | *        |
| K6-0    | 0.25     | 0.29     | 1.21     | 1.56     | 0.88     |
| K6-1    | 1.95     | 2.01     | 0.58     | 0.56     | 0.36     |
| K6-2    | 1.74     | 1.58     | 0.83     | 0.93     | 0.74     |
| K7-0    | 0.96     | 0.31     | 1.71     | 1.54     | 1.02     |
| K7-1    | 0.40     | 1.34     | 1.19     | 0.40     | 1.90     |
| K7-2    | 0.73     | 1.27     | 1.55     | 0.78     | 1.45     |
| K8-0    | 0.29     | 1.25     | 0.07     | 0.98     | 1.09     |
| K8-1    | 2.17     | 2.04     | 1.96     | 1.74     | 0.08     |
| K8-2    | 1.83     | 1.84     | 1.67     | 1.58     | 1.81     |
| K9-0    | 1.39     | 0.20     | 0.22     | 0.24     | 0.26     |
| K9-1    | 0.38     | 1.08     | 0.39     | 1.79     | 0.69     |
| K9-2    | 0.70     | 1.80     | 0.68     | 1.71     | 1.71     |

\* Mice that died from other causes than scrapie

Table S2: Survival time (individual values) of RML-infected C57/Bl6 mice immunised with virus-like particles.

| <b>Construct</b>     | <b>Incubation time [days]</b> |          |          |          |          | <b>mean value</b> | standard deviation | <b>elongation [d] to untreated control</b> | <b>log rank test</b> |
|----------------------|-------------------------------|----------|----------|----------|----------|-------------------|--------------------|--------------------------------------------|----------------------|
|                      | Animal 1                      | Animal 2 | Animal 3 | Animal 4 | Animal 5 |                   |                    |                                            |                      |
| <b>control</b>       | 209                           | 197      | 200      | 200      | 202      | <b>201.6</b>      | 4.5                | -                                          | -                    |
| <b>VP1/2 control</b> | 203                           | 211      | 218      | 223      | *        | <b>213.75</b>     | 8.7                | <b>12.15</b>                               | 0.017                |
| <b>Construct K1</b>  | 232                           | 204      | 281      | 197      | 267      | <b>236.2</b>      | 37.2               | <b>34.6</b>                                | n.s.                 |
| <b>Construct K2</b>  | 232                           | 207      | 232      | 211      | 200      | <b>216.4</b>      | 14.8               | <b>14.8</b>                                | n.s.                 |
| <b>Construct K3</b>  | 207                           | 209      | 134      | 210      | 207      | <b>193.4</b>      | 33.2               | <b>-8.2</b>                                | n.s.                 |
| <b>Construct K4</b>  | 210                           | 223      | 162      | 211      | 218      | <b>204.8</b>      | 24.5               | <b>3.2</b>                                 | n.s.                 |
| <b>Construct K5</b>  | 223                           | 200      | 223      | 225      | *        | <b>217.75</b>     | 11.9               | <b>16.2</b>                                | n.s.                 |
| <b>Construct K6</b>  | 232                           | 210      | 197      | 202      | 209      | <b>210</b>        | 13.4               | <b>8.4</b>                                 | n.s.                 |
| <b>Construct K7</b>  | 232                           | 218      | 218      | 211      | 225      | <b>220.8</b>      | 8.0                | <b>19.2</b>                                | n.s.                 |
| <b>Construct K8</b>  | 204                           | 210      | 217      | 211      | 217      | <b>211.8</b>      | 5.4                | <b>10.2</b>                                | n.s.                 |
| <b>Construct K9</b>  | 237                           | 249      | 249      | 218      | 249      | <b>240.4</b>      | 13.6               | <b>38.8</b>                                | p≤0.015              |

\* Mice that died from other causes than scrapie

Figure S1

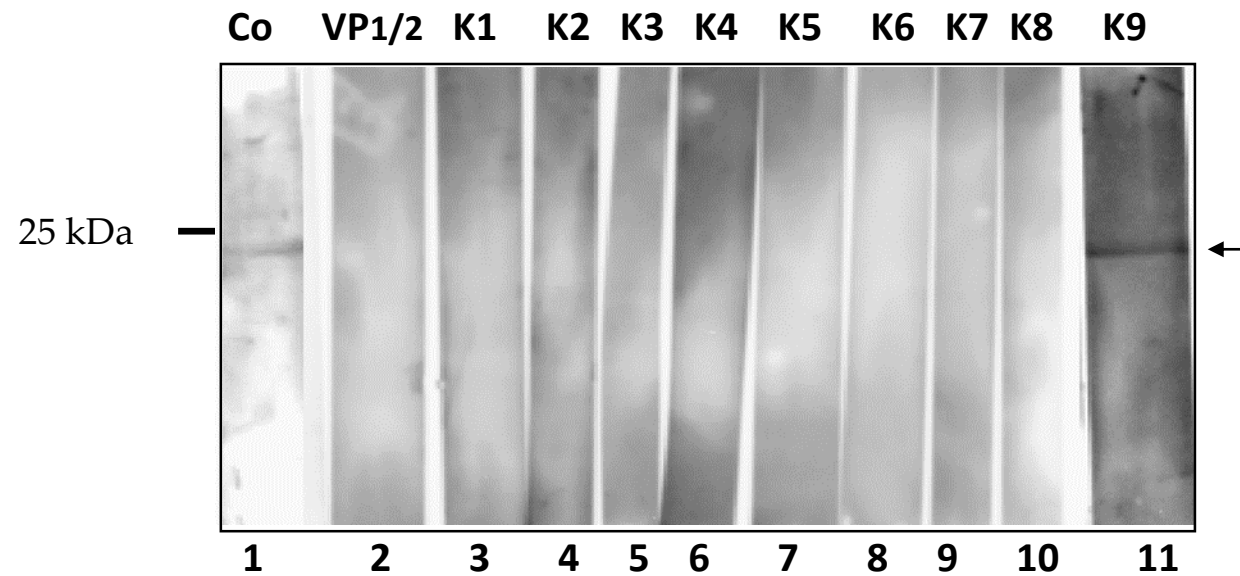

Figure S1. Western blot analysis of pooled sera from animals immunized with VP1/2 control (VP1, lane 2), K1 (lane 3), K2 (lane 4), K3 (lane 5), K4 (Lane 6), K5 (lane 7), K6 (lane 8), K7 (lane 9), K8 (lane 10), K9 (lane 11). Each lane contains blotted recombinant murine prion protein separated on an 16% SDS-PAGE and probed with corresponding serum pools. mAb SAF70 (lane 1) was used as a positive control (Co).

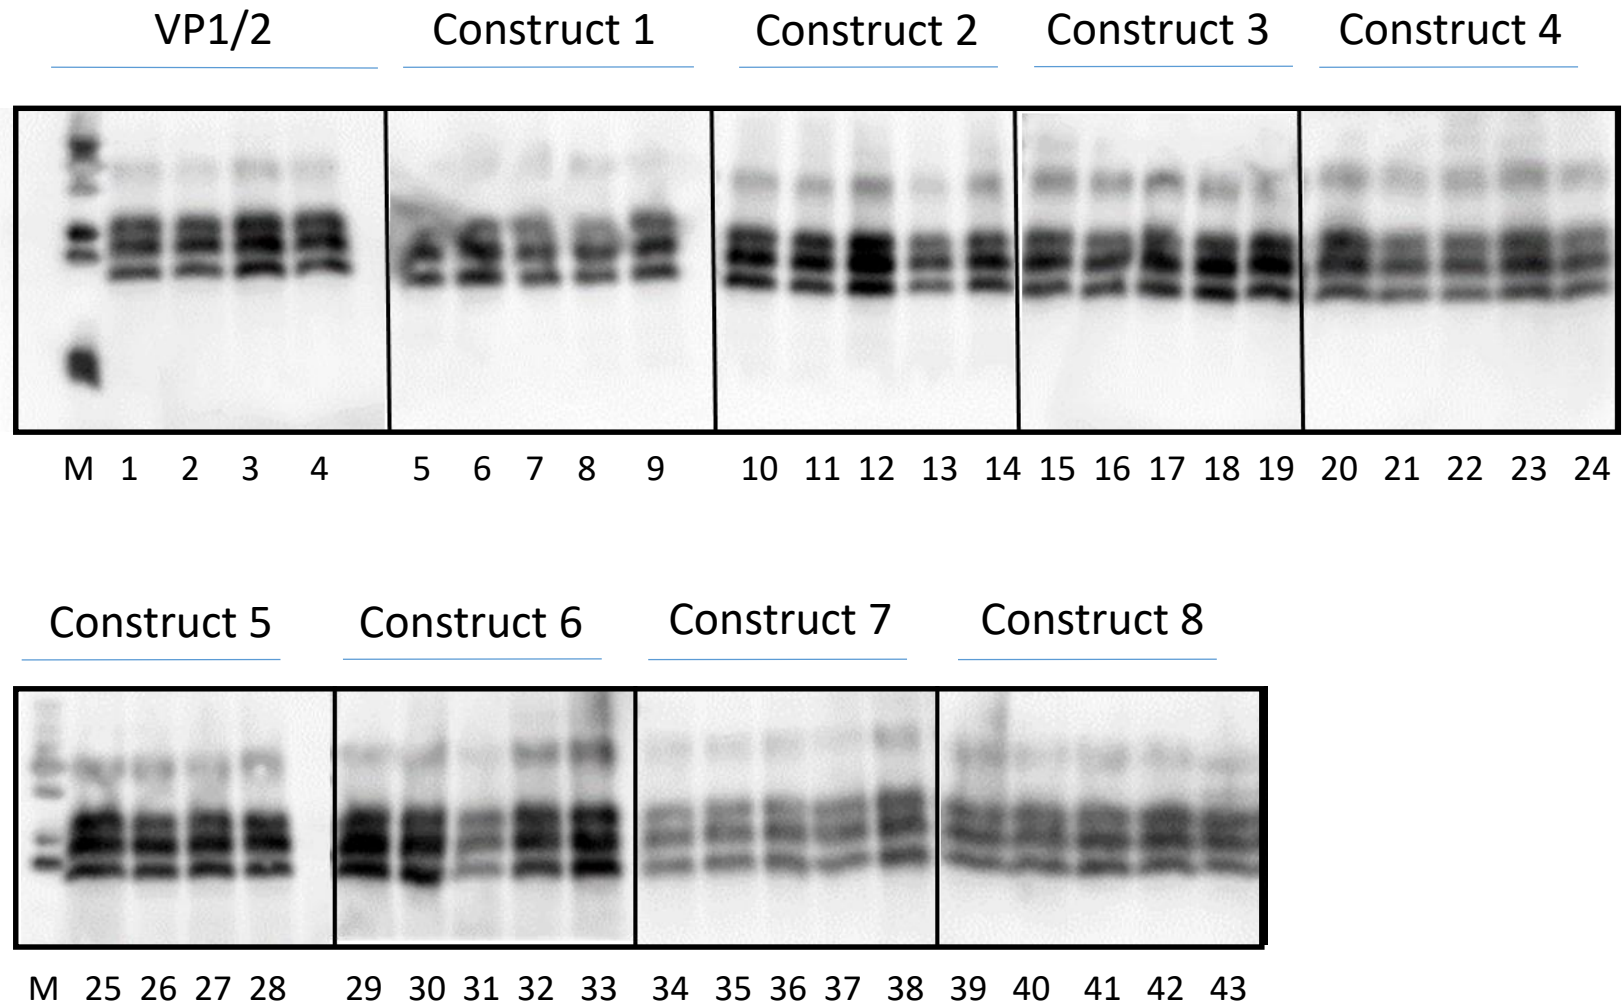

Figure S2. PrP<sup>Sc</sup> accumulation in the brains of selected mice challenged with RML. Immunoblot analysis of RML-infected mouse brain homogenate digested with proteinase K (PK). PrP<sup>Sc</sup> of scrapie infected mice after VP1/2 immunisation (lane 1-4), after immunisation with construct 1 (lanes 5-9), with construct 2 (lanes 10-14), with construct 3 (lanes 15-19), with construct 4 (lanes 20-24), with construct 5 (lanes 25-28), with construct 6 (lanes 29-33), with construct 7 (lanes 34-38) and with construct 8 (lanes 39-43) Detection of PrP<sup>Sc</sup> was carried out with mAb SAF70. (M) molecular weight marker.
